# Supplementary material for: Aqueous-based synthesis of gallium tungsten oxide thin film dielectrics
Source: Royal Society of Chemistry journal article supplement (doi:10.1039/c4tc02985b), 2015-01-01
Supplement: c4tc02985b1.pdf [file c4tc02985b1.pdf]

## Supplementary Information: Aqueous-based synthesis of gallium tungsten oxide thin film dielectrics

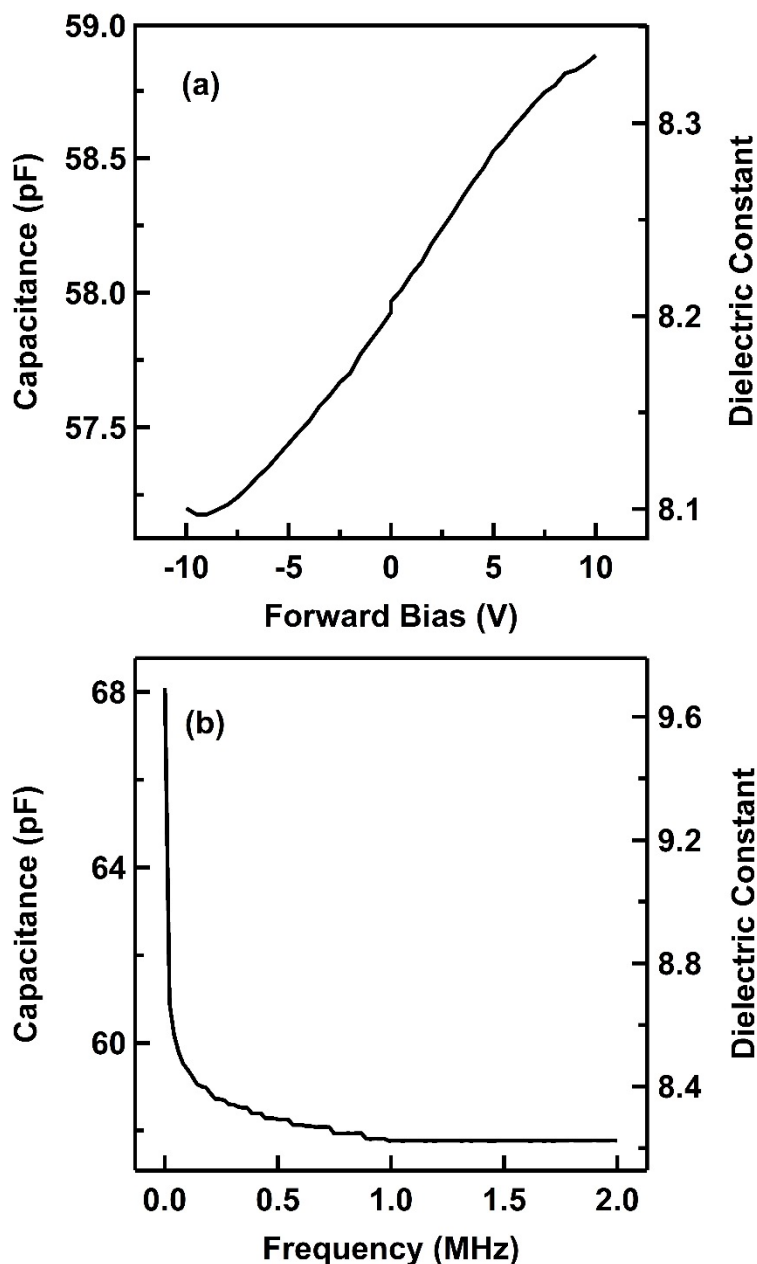

**Figure S1:** Capacitance-voltage measurement at frequency 1 MHz (a) and capacitance-frequency measurement at no applied bias (b) for a representative  $\text{Ga}_{2-x}\text{W}_{x/2}\text{O}_{3-\delta}$  thin film (17.1 at% W, 600 °C anneal). The corresponding dielectric constant was estimated assuming a parallel plate capacitor.
